# Supplementary material for: Facile synthesis of battery waste-derived graphene for transparent and conductive film application by an electrochemical exfoliation method
Source: Royal Society of Chemistry journal article supplement (doi:10.1039/d0ra01100b), 2020-01-01
Supplement: d0ra01100b1.pdf [file d0ra01100b1.pdf]

## Electronic Supplementary Information

### Facile synthesis of battery waste-derived graphene for transparent and conductive film application by electrochemical exfoliation method

Bagas Prakoso,<sup>a</sup> Yuanyuan Ma,<sup>b,c</sup> Ruth Stephanie,<sup>a</sup> Naufal Hanif Hawari,<sup>a</sup> Veinardi Suendo,<sup>d,e</sup> Hermawan Judawisastra,<sup>a</sup> Yun Zong,<sup>c,\*</sup> Zhaolin Liu<sup>c,\*</sup> and Afriyanti Sumboja<sup>a,f,\*</sup>

<sup>a</sup> Material Science and Engineering Research Group, Faculty of Mechanical and Aerospace Engineering, Institut Teknologi Bandung, Jl. Ganesha 10, Bandung 40132, Indonesia

<sup>b</sup> Department of Materials Science and Engineering, National University of Singapore, 117574, Singapore

<sup>c</sup> Institute of Materials Research and Engineering (IMRE), A\*STAR (Agency for Science, Technology and Research), 2 Fusionopolis Way, Innovis #08-03 138634, Singapore

<sup>d</sup> Inorganic and Physical Chemistry Research Group, Faculty Mathematics and Natural Sciences, Institut Teknologi Bandung, Jl. Ganesha 10, Bandung 40132, Indonesia

<sup>e</sup> Research Center for Nanosciences and Nanotechnology, Institut Teknologi Bandung, Jl. Ganesha 10, Bandung 40132, Indonesia

<sup>f</sup> National Centre for Sustainable Transportation Technology (NCSTT), Jl. Ganesha 10, Bandung 40132, Indonesia

\*Corresponding authors.

E-mail addresses : [afriyanti.sumboja@material.itb.ac.id](mailto:afriyanti.sumboja@material.itb.ac.id) (A. Sumboja), [y-zong@imre.a-star.edu.sg](mailto:y-zong@imre.a-star.edu.sg) (Y. Zong), [zl-liu@imre.a-star.edu.sg](mailto:zl-liu@imre.a-star.edu.sg) (Z. Liu)

## S1. Experimental set up for the synthesis of graphene

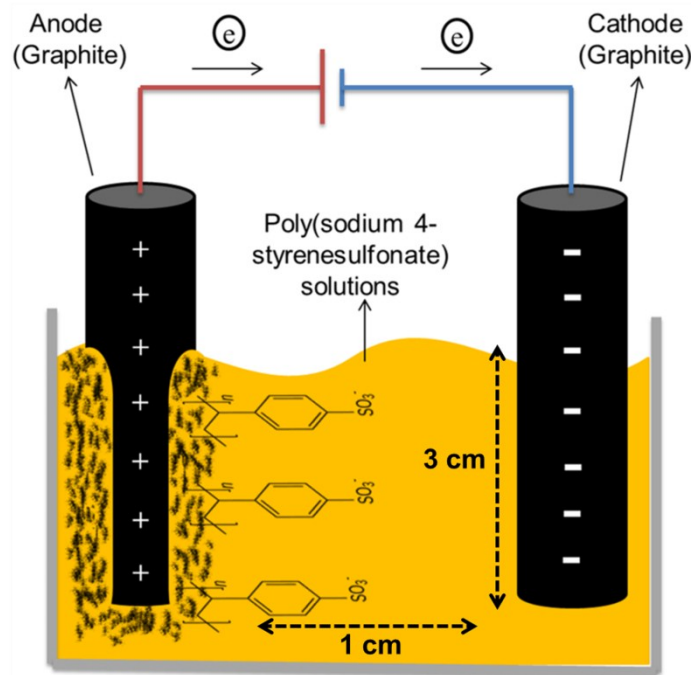

**Fig. S1** Schematic of the electrochemical set up during the electrochemical exfoliation of graphite.

## S2. Digital images of all graphene-PSS dispersions

Large PSS concentration and high applied voltage during the synthesis process lead to the formation of a dark brownish color of graphene-PSS dispersion. This fact indicates the escalation of exfoliation process which results in the higher concentration of exfoliated graphene.

|                   |       | Voltage (V)                                                                         |                                                                                      |                                                                                       |
|-------------------|-------|-------------------------------------------------------------------------------------|--------------------------------------------------------------------------------------|---------------------------------------------------------------------------------------|
|                   |       | 3                                                                                   | 5                                                                                    | 8                                                                                     |
| Concentration (M) | 0.001 | -                                                                                   | -                                                                                    |    |
|                   | 0.02  |    |    |    |
|                   | 0.1   |   |   |   |
|                   | 0.5   |  |  |  |

**Fig. S2** Digital images of all graphene-PSS dispersions

### S3. The UV Vis spectra of all graphene-PSS dispersions

The intensity of the absorption peaks of graphene-PSS dispersion grows with the increase of the applied voltage and PSS concentration. This is because that larger applied voltage and higher PSS concentration will escalate the intercalation process of polystyrenesulfonate anion into the graphite rod, resulting in a high concentration of exfoliated graphene in the PSS solution. Furthermore, the absorption peak of graphene-PSS dispersions is observed to be red-shifted with the increase of applied voltage and PSS concentration due to the strong interaction of graphene with PSS.

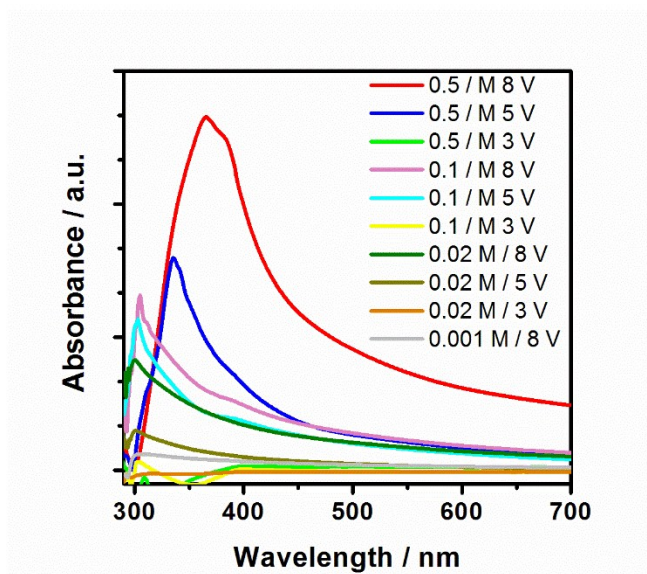

Fig. S3 The UV Vis spectra of all graphene-PSS dispersions

#### S4. Raman spectrum of Graphene 0.02/5

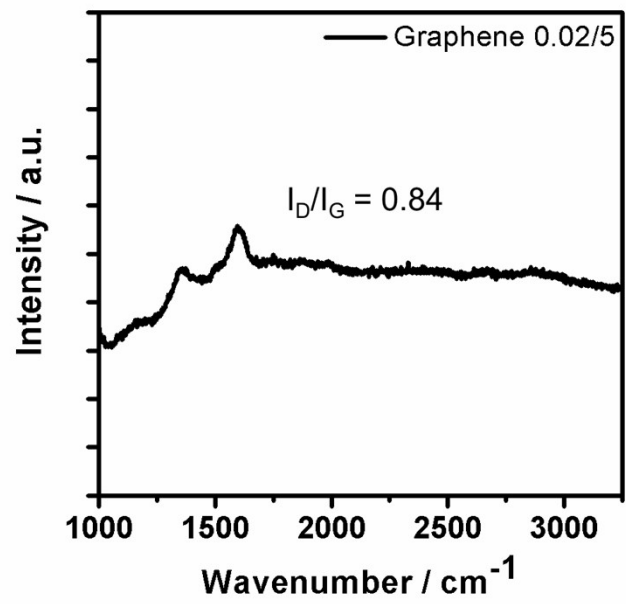

Fig. S4. Raman spectrum of Graphene 0.02/5

### S5. XPS spectrum of Zn2p, Mn2p, Fe2p, and Cl2p in graphene 0.5 M / 5 V

XPS spectrum of graphene sample confirm no peak of impurities from Zn-C battery elements (e.g. Zn2p, Mn2p, Fe2p and Cl2p) observed.

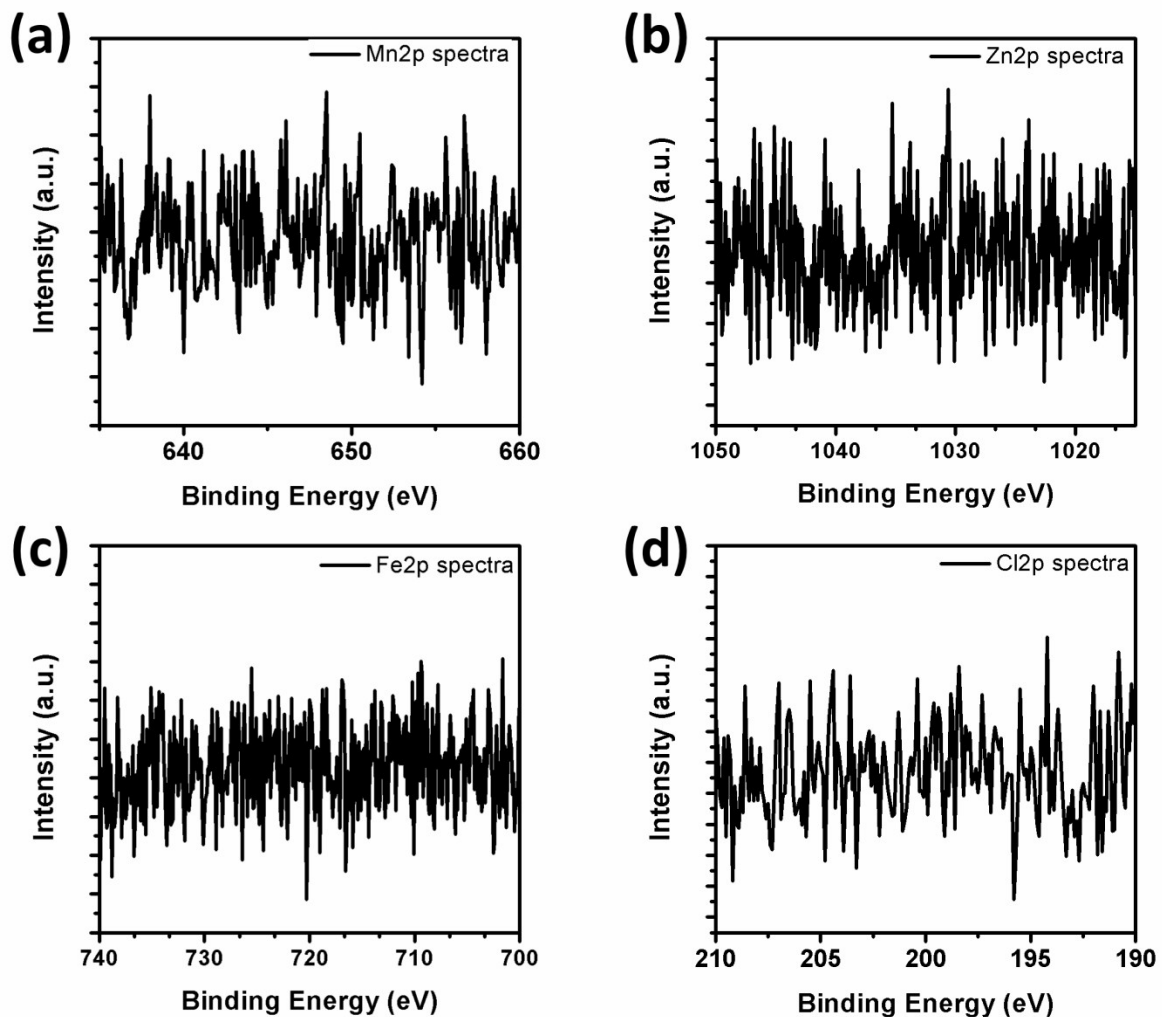

**Fig. S5** XPS spectrum of a) Mn2p, b) Zn2p, c) Fe2p, and d) Cl2p elements  
in graphene 0.5 M / 5V

**S6. SEM image of graphene**

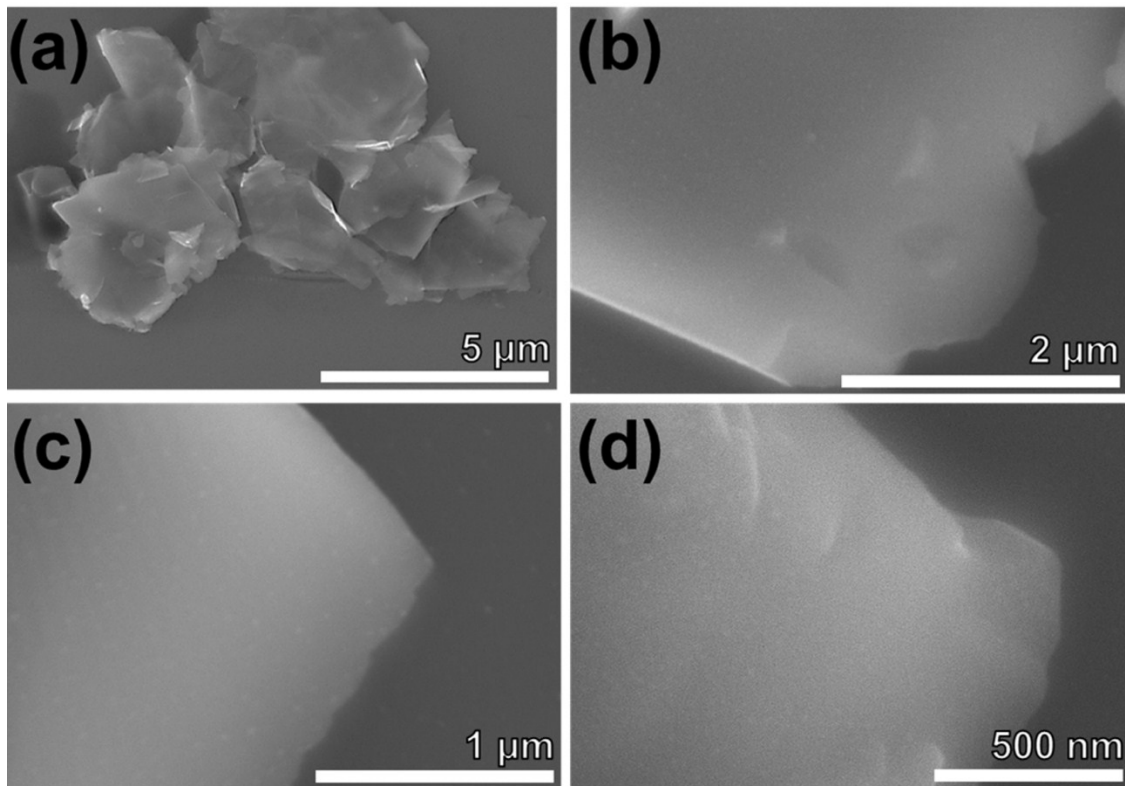

**Fig. S6** SEM images of graphene sample under several magnifications.

**S7. HRTEM image of graphene**

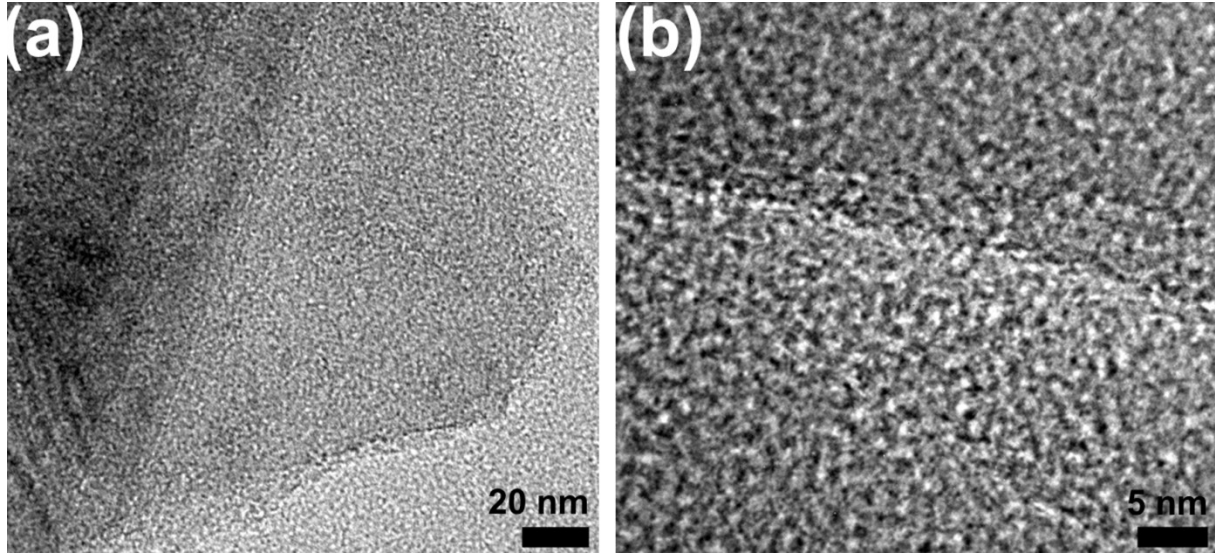

**Fig. S7** a) TEM and b) HRTEM images of the graphene sample.



**S8. Defect ratio ( $I_D/I_G$ ) measurement of various graphene samples****Table S1.** Defect ratio ( $I_D/I_G$ ) of the graphene prepared by electrochemical exfoliation in the literature

| Electrolyte                                     | Source material             | Voltage (V) | Defect ratio ( $\frac{I_D}{I_G}$ ) | Reference |
|-------------------------------------------------|-----------------------------|-------------|------------------------------------|-----------|
| PSS                                             | Graphite of spent battery   | 5           | 0.86                               | This work |
| H <sub>2</sub> SO <sub>4</sub>                  | Graphite of spent battery   | 10          | 0.95                               | 1         |
| (NH <sub>4</sub> ) <sub>2</sub> SO <sub>4</sub> | Graphite foil               | 10          | 1.9                                | 2         |
| SDBS                                            | Graphite of spent battery   | 4.5         | 0.2                                | 3         |
| H <sub>2</sub> SO <sub>4</sub>                  | Graphite foil               | 3           | 0.97*                              | 4         |
| (NH <sub>4</sub> ) <sub>2</sub> SO <sub>4</sub> | High purity graphite & HOPG | 12          | 1-1.03                             | 5         |
| H <sub>2</sub> SO <sub>4</sub> melamine         | Graphite                    | 20          | 0.2-0.54                           | 6         |
| TCNQ/DMSO                                       | High purity graphite        | 25          | 1.02                               | 7         |
| SDBS                                            | Graphite                    | 25          | 0.98-1.05                          | 8         |
| BMTF <sub>2</sub> N                             | HOPG                        | -20         | 0.05-1.7                           | 9         |
| Na <sub>2</sub> SO <sub>4</sub> & SDS           | HOPG                        | 5-6         | 1.02*                              | 10        |
| Ionic liquid                                    | High purity graphite        | 20          | 1.41                               | 11        |
| SDS                                             | High purity graphite        | 1.4 - 2     | 0.124 – 1.370                      | 12        |

Note: \* Graphene obtained without further modification

**S9. Sheet resistance and transmittance value of various graphene thin films****Table S2.** Sheet resistance and transmittance value of various graphene thin films in the literature

| Source material             | Synthesis method            | Sheet resistance ( $\text{k}\Omega \text{sq}^{-1}$ ) | Transmittance (%) | Reference |
|-----------------------------|-----------------------------|------------------------------------------------------|-------------------|-----------|
| Graphite of spent battery   | Electrochemical exfoliation | 1.1                                                  | 89                | This work |
| Graphite foil               | Electrochemical exfoliation | 2.7                                                  | -                 | 2         |
| Graphite foil               | Electrochemical exfoliation | 100                                                  | 94.4              | 13        |
| Graphite flake              | Electrochemical exfoliation | 22.31                                                | 73                | 14        |
| Natural graphite rocks      | Hummers                     | 22                                                   | 88                | 15        |
| Expandable graphite         | LPE                         | 7.3                                                  | -                 | 16        |
| High purity graphite & HOPG | Electrochemical exfoliation | 0.32                                                 | < 20              | 5         |
| Graphite foil               | Electrochemical exfoliation | 3.91                                                 | 85                | 17        |
| HOPG                        | Electrochemical exfoliation | 0.44 *                                               | 75.8              | 10        |
| HOPG                        | Electrochemical exfoliation | 0.66 *                                               | 96                | 18        |
| CH <sub>4</sub>             | CVD                         | 0.125                                                | 97.4              | 19        |

Note: \* Graphene film modified by thermal annealing or chemical doping

## References

1. S. Bandi, S. Ravuri, D. R. Peshwe and A. K. Srivastav, *J. Hazard. Mater.*, 2019, **366**, 358-369.
2. K. Parvez, R. Worsley, A. Alieva, A. Felten and C. Casiraghi, *Carbon*, 2019, **149**, 213-221.
3. S. K. Tiwari, A. Huczko, R. Oraon, A. De Adhikari and G. Nayak, *Arabian J. Chem.*, 2017, **10**, 556-565.
4. Y. Gong, Y. Ping, D. Li, C. Luo, X. Ruan, Q. Fu and C. Pan, *Appl Surf Sci*, 2017, **397**, 213-219.
5. Z. M. Marković, M. Budimir, D. P. Kević, I. D. Holclajtner-Antunović, M. Marinović-Cincović, M. Dramićanin, V. Spasojević, D. Peruško, Z. Špitalský and M. Mičušik, *RSC Adv.*, 2016, **6**, 39275-39283.
6. C.-H. Chen, S.-W. Yang, M.-C. Chuang, W.-Y. Woon and C.-Y. Su, *Nanoscale*, 2015, **7**, 15362-15373.
7. P. Khanra, C.-N. Lee, T. Kuila, N. H. Kim, M. J. Park and J. H. Lee, *Nanoscale*, 2014, **6**, 4864-4873.
8. E. H. Joo, T. Kuila, N. H. Kim, J. H. Lee, S. A. Kim, E. G. Park and U. H. Lee, *Adv. Mater. Res.*, 2013, **747**, 246-249.
9. Y. Yang, F. Lu, Z. Zhou, W. Song, Q. Chen and X. Ji, *Electrochim. Acta*, 2013, **113**, 9-16.
10. J. Liu, M. Notarianni, G. Will, V. T. Tiong, H. Wang and N. Motta, *Langmuir*, 2013, **29**, 13307-13314.
11. P. Khanra, T. Kuila, S. H. Bae, N. H. Kim and J. H. Lee, *J. Mater. Chem.*, 2012, **22**, 24403-24410.
12. M. Alanyalıoğlu, J. J. Segura, J. Oro-Sole and N. Casan-Pastor, *Carbon*, 2012, **50**, 142-152.
13. V. E. Blair, K. Celebi, K. Müllen and J. Vermant, *Adv. Mater. Interfaces*, 2019, **6**, 1801570.
14. E. Aawani, H. R. Dizaji and N. Memarian, *Opt. Quantum Electron.*, 2018, **50**, 129.
15. F. Alotaibi, T. T. Tung, M. J. Nine, S. Kabiri, M. Moussa, D. N. Tran and D. Losic, *Carbon*, 2018, **127**, 113-121.
16. Y. Çelik, E. Flahaut and E. Suvacı, *FlatChem*, 2017, **1**, 74-88.
17. S. Yang, S. Brüller, Z.-S. Wu, Z. Liu, K. Parvez, R. Dong, F. Richard, P. Samorì, X. Feng and K. Müllen, *J. Am. Chem. Soc.*, 2015, **137**, 13927-13932.
18. C.-Y. Su, A.-Y. Lu, Y. Xu, F.-R. Chen, A. N. Khlobystov and L.-J. Li, *ACS nano*, 2011, **5**, 2332-2339.
19. S. Bae, H. Kim, Y. Lee, X. Xu, J.-S. Park, Y. Zheng, J. Balakrishnan, T. Lei, H. R. Kim and Y. I. Song, *Nat. Nanotechnol.*, 2010, **5**, 574.
